# Supplementary material
Source: publisher site journal article supplement (https://www.spandidos-publications.com/1172/downloadSupplementary)

Figure S1. PC analysis of miRNAs and mRNAs in hepatocellular carcinoma. miR, microRNA; PC, principal component.

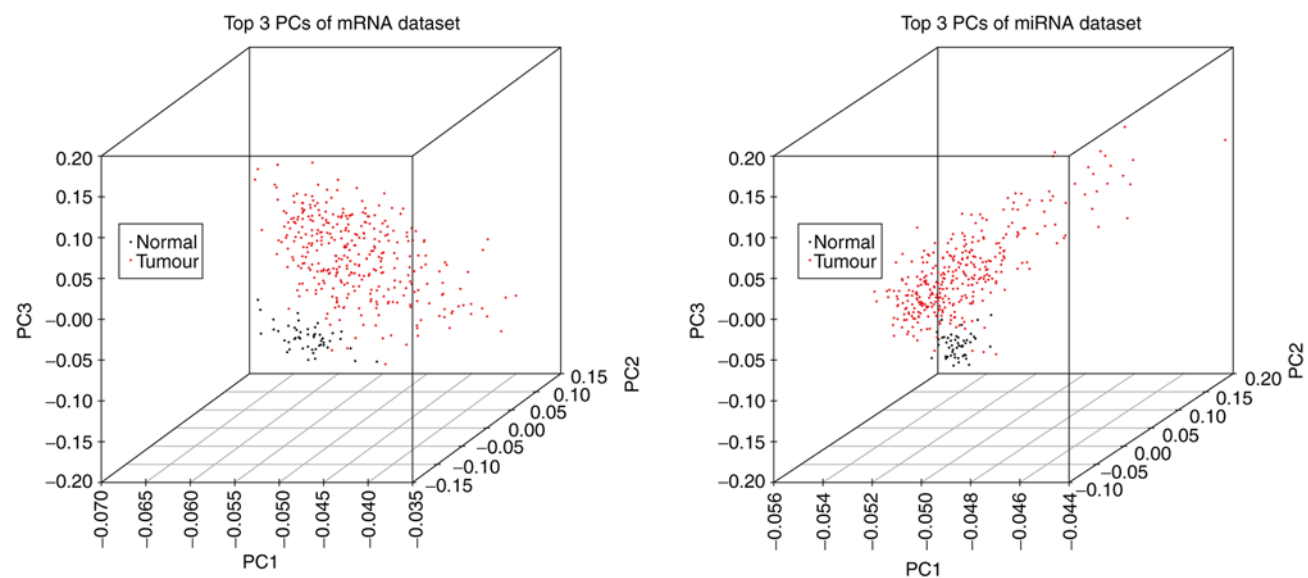

Supplement: Supplementary file 1 [file downloadSupplementary]
